# Supplementary material
Source: MDPI journal article supplement (https://www.mdpi.com/2073-4395/11/1/122)
Supplement: s1 [file s1]

**Table S1.** Pairwise correlations among peel color parameters, CO<sub>2</sub> and C<sub>2</sub>H<sub>4</sub> production rates, phenolic compounds, and total antioxidant capacity (TAC), in Koroneiki, olives of different maturity indices (MI), in ~~harvest periods~~ crop years A and B.

|                               | <i>L</i> <sup>*</sup> | <i>h</i> <sup>o</sup> | <i>C</i> <sup>*</sup> | CO <sub>2</sub> | C <sub>2</sub> H <sub>4</sub> | OE <sup>+</sup> | Ver           | HT            | Tyr           | Lut-7        | Rutin         | Quercetin     | Luteolin      |
|-------------------------------|-----------------------|-----------------------|-----------------------|-----------------|-------------------------------|-----------------|---------------|---------------|---------------|--------------|---------------|---------------|---------------|
| <i>h</i> <sup>o</sup>         | -0.097<br>ns          |                       |                       |                 |                               |                 |               |               |               |              |               |               |               |
| <i>C</i> <sup>*</sup>         | 0.434<br>*            | -0.373<br>ns          |                       |                 |                               |                 |               |               |               |              |               |               |               |
| CO <sub>2</sub>               | -0.784<br>***         | 0.444<br>*            | -0.537<br>*           |                 |                               |                 |               |               |               |              |               |               |               |
| C <sub>2</sub> H <sub>4</sub> | -0.804<br>***         | -0.442<br>*           | -0.377<br>ns          | 0.422<br>ns     |                               |                 |               |               |               |              |               |               |               |
| OE                            | 0.904<br>***          | 0.123<br>ns           | 0.545<br>*            | -0.695<br>***   | -0.897<br>***                 |                 |               |               |               |              |               |               |               |
| Ver                           | 0.515<br>*            | 0.666<br>**           | -0.272<br>ns          | -0.138<br>ns    | -0.7469<br>***                | 0.516<br>*      |               |               |               |              |               |               |               |
| HT                            | -0.741<br>***         | -0.507<br>*           | -0.194<br>ns          | 0.299<br>ns     | 0.926<br>***                  | -0.841<br>***   | -0.705<br>*** |               |               |              |               |               |               |
| Tyr                           | -0.583<br>**          | -0.543<br>*           | -0.233<br>ns          | 0.158<br>ns     | 0.835<br>***                  | -0.744<br>***   | -0.549<br>**  | 0.957<br>***  |               |              |               |               |               |
| Lut-7                         | 0.800<br>***          | 0.393<br>ns           | -0.104<br>ns          | -0.435<br>*     | -0.810<br>***                 | 0.743<br>***    | 0.860<br>***  | -0.854<br>*** | -0.692<br>*** |              |               |               |               |
| Rutin                         | 0.745<br>***          | 0.548<br>*            | -0.020<br>ns          | -0.383<br>ns    | -0.889<br>***                 | 0.790<br>***    | 0.894<br>***  | -0.907<br>*** | -0.776<br>*** | 0.965<br>*** |               |               |               |
| Quercetin                     | 0.602<br>**           | 0.113<br>ns           | -0.161<br>ns          | -0.625<br>**    | -0.428<br>ns                  | 0.483<br>*      | 0.643<br>**   | -0.341<br>ns  | -0.113<br>ns  | 0.714<br>*** | 0.660<br>***  |               |               |
| Luteolin                      | -0.446<br>*           | -0.641<br>***         | -0.068<br>ns          | -0.042<br>ns    | 0.765<br>***                  | -0.629<br>**    | -0.587<br>**  | 0.906<br>***  | 0.940<br>***  | -0.649<br>** | -0.738<br>*** | -0.0377<br>ns |               |
| TAC                           | 0.757<br>***          | 0.416<br>ns           | 0.417<br>ns           | -0.507<br>*     | -0.909<br>***                 | 0.900<br>***    | 0.581<br>**   | -0.912<br>*** | -0.880<br>*** | 0.746<br>*** | 0.840<br>***  | 0.423<br>ns   | -0.751<br>*** |

<sup>+</sup> OE, oleuropein; Ver, verbascoside; HT, hydroxytyrosol; Tyr, tyrosol; Lut-7, luteolin-7-O-glucoside.

ns, not significant. \*\*, Significant at  $P < 0.01$ . \*\*\*, Significant at  $P < 0.001$ .
